# Supplementary material
Source: publisher figshare collection journal article supplement (https://gsapubs.figshare.com/ndownloader/files/23319686)
Supplement: Supplementary file 1 [file 23319686]

## Sheet: Sheet1
TABLE DR8. SUMMARY OF 40Ar/39Ar STEP HEATING RESULTS
							Preferred Age									Integrated Age
Sample	FM	Section	L#	Irrad	min	analysis	n	%39Ar	MSWD	K/Ca	±	2σ	Age (Ma)	±	1σ	n	Age (Ma)	±	1σ
CM-SS4	OA	MDC	61414-63	NM-254E	Sanidine	Plateau	5	100	4.09	42.9	±	3.5	66.2735	±	0.116648	5	66.3403	±	0.0936543
CM-SS4	OA	MDC	61414-19	NM-254E	Sanidine	Plateau	4	100	14.29	144.214	±	30.055	68.1284	±	0.108783	4	68.2057	±	0.0867654
CM-SS4	OA	MDC	61414-13	NM-254E	Sanidine	Plateau	4	96.6442	18.62	122.4	±	11.8	69.1297	±	0.117026	5	69.2176	±	0.0875219
CM-SS4	OA	MDC	61414-39	NM-254E	Sanidine	Step B	1	82.2705	NA	155.46	±	0	69.5995	±	0.023121	2	69.9285	±	0.117669
CM-SS4	OA	MDC	61414-15	NM-254E	Sanidine	Plateau	5	100	145.54	113.796	±	46.982	69.6711	±	0.154503	5	69.7645	±	0.0876975
CM-SS4	OA	MDC	61414-04	NM-254E	Sanidine	Plateau	5	100	31.51	117.548	±	17.566	69.7072	±	0.106248	5	69.7009	±	0.0861517
CM-SS4	OA	MDC	61414-40	NM-254E	Sanidine	Plateau	2	91.2799	13.87	242.979	±	65.927	71.0447	±	0.126021	3	70.6017	±	0.0899304
CM-SS4	OA	MDC	61414-12	NM-254E	Sanidine	Plateau	4	95.2791	22.83	126.3	±	18.7	73.5821	±	0.107943	5	73.6922	±	0.0911325
CM-SS4	OA	MDC	61414-58	NM-254E	Sanidine	Plateau	2	100	0.02	95.485	±	40.715	73.8735	±	0.0927806	2	73.8799	±	0.100978
CM-SS4	OA	MDC	61414-17	NM-254E	Sanidine	Plateau	4	100	34.12	122.264	±	57.114	73.9911	±	0.25633	4	73.987	±	0.101408
CM-SS4	OA	MDC	61414-60	NM-254E	Sanidine	Plateau	2	100	6.96	147.694	±	30.231	74.0626	±	0.141653	2	74.2901	±	0.131158
CM-SS4	OA	MDC	61414-10	NM-254E	Sanidine	Plateau	4	92.8055	39.09	142.291	±	28.018	74.0765	±	0.126118	5	74.2563	±	0.0920539
CM-SS4	OA	MDC	61414-08	NM-254E	Sanidine	Plateau	5	100	90.45	115.993	±	32.178	74.1581	±	0.126145	5	74.1229	±	0.0910972
CM-SS4	OA	MDC	61414-14	NM-254E	Sanidine	Plateau	3	83.2432	50.97	120.921	±	5.316	74.2159	±	0.14518	5	74.3291	±	0.0955631
CM-SS4	OA	MDC	61414-07	NM-254E	Sanidine	Plateau	5	100	47.2	178.069	±	550.286	74.2217	±	0.148748	5	74.2427	±	0.0926893
CM-SS4	OA	MDC	61414-37	NM-254E	Sanidine	Step B	1	90.3984	NA	124.2			74.2319	±	0.0296927	2	73.7855	±	0.117012
CM-SS4	OA	MDC	61414-31	NM-254E	Sanidine	Plateau	2	100	3.51	146.227	±	2.22	74.3169	±	0.11306	2	74.5535	±	0.159145
CM-SS4	OA	MDC	61414-23	NM-254E	Sanidine	Plateau	2	100	0.31	138.788	±	22.094	74.4833	±	0.106722	2	74.4037	±	0.179692
CM-SS4	OA	MDC	61414-47	NM-254E	Sanidine	Plateau	2	100	4.13	110.75	±	14.093	74.5138	±	0.139461	2	74.7994	±	0.17464
CM-SS4	OA	MDC	61414-06	NM-254E	Sanidine	Plateau	4	97.2593	6.64	116.1	±	29.5	74.5599	±	0.104874	5	74.4239	±	0.0936787
CM-SS4	OA	MDC	61414-74	NM-254E	Sanidine	Plateau	2	100	5.17	110.196	±	6.776	74.6065	±	0.18703	2	75.0459	±	0.2242
CM-SS4	OA	MDC	61414-54	NM-254E	Sanidine	Plateau	2	100	0.15	122.719	±	0	74.6253	±	0.097612	2	74.5973	±	0.12166
CM-SS4	OA	MDC	61414-25	NM-254E	Sanidine	Plateau	2	100	6.92	110.303	±	26.369	74.6599	±	0.274177	2	74.923	±	0.16691
CM-SS4	OA	MDC	61414-79	NM-254E	Sanidine	Plateau	2	100	1.05	111.365	±	5.395	74.711	±	0.228677	2	74.9357	±	0.31248
CM-SS4	OA	MDC	61414-48	NM-254E	Sanidine	Plateau	2	100	0.02	122.082	±	29.611	74.7167	±	0.0950322	2	74.7105	±	0.106921
CM-SS4	OA	MDC	61414-34	NM-254E	Sanidine	Plateau	2	100	6.16	118.841	±	33.859	74.7266	±	0.0949087	2	74.6874	±	0.0931976
CM-SS4	OA	MDC	61414-05	NM-254E	Sanidine	Plateau	4	93.9095	30.86	113.718	±	11.225	74.7283	±	0.126227	5	74.6909	±	0.0930489
CM-SS4	OA	MDC	61414-42	NM-254E	Sanidine	Plateau	2	100	1.33	152.32	±	44.049	74.7476	±	0.108979	2	74.5718	±	0.185944
CM-SS4	OA	MDC	61414-44	NM-254E	Sanidine	Plateau	2	100	8.39	167.548	±	66.161	74.7618	±	0.131087	2	74.5245	±	0.127024
CM-SS4	OA	MDC	61414-65	NM-254E	Sanidine	Plateau	2	100	0.16	92.16	±	10.431	74.8059	±	0.127467	2	74.7298	±	0.230739
CM-SS4	OA	MDC	61414-09	NM-254E	Sanidine	Plateau	4	93.2595	10.95	115.965	±	13.123	74.9001	±	0.122303	5	74.38	±	0.0954034
CM-SS4	OA	MDC	61414-68	NM-254E	Sanidine	Plateau	2	100	2.93	160.078	±	46.935	74.9073	±	0.155916	2	75.0624	±	0.148368
CM-SS4	OA	MDC	61414-55	NM-254E	Sanidine	Plateau	2	100	0.14	921.414	±	1463.03	74.9863	±	0.134126	2	75.0332	±	0.182993
CM-SS4	OA	MDC	61414-81	NM-254E	Sanidine	Plateau	2	100	1.03	78.408	±	38.322	75.1064	±	0.102314	2	75	±	0.146932
CM-SS4	OA	MDC	61414-21	NM-254E	Sanidine	Plateau	3	96.2598	15.47	102.5	±	8.872	75.1194	±	0.112396	5	74.8112	±	0.0938275
CM-SS4	OA	MDC	61414-45	NM-254E	Sanidine	Plateau	2	100	0.54	131.492	±	92.995	75.1519	±	0.148209	2	75.3725	±	0.308819
CM-SS4	OA	MDC	61414-18	NM-254E	Sanidine	Plateau	5	100	14.61	142.4	±	55.7	75.1694	±	0.107609	5	75.1823	±	0.10167
CM-SS4	OA	MDC	61414-82	NM-254E	Sanidine	Plateau	2	97.163	8.6	121.174	±	87.402	75.2377	±	0.285181	3	74.9689	±	0.162828
CM-SS4	OA	MDC	61414-11	NM-254E	Sanidine	Plateau	4	93.8259	7.61	100.582	±	3.136	75.4188	±	0.104426	5	75.6011	±	0.0995541
CM-SS4	OA	MDC	61414-51	NM-254E	Sanidine	Step B	1	76.6334	NA	122.331			75.4468	±	0.0157961	2	75.6305	±	0.111274
CM-SS4	OA	MDC	61414-38	NM-254E	Sanidine	Plateau	2	100	0.13	91.104	±	17.797	75.6088	±	0.111684	2	75.646	±	0.15057
CM-SS4	OA	MDC	61414-59	NM-254E	Sanidine	Step B	1	36.0505	NA	107.058			75.64	±	0.12	2	77.9682	±	0.225347
CM-SS4	OA	MDC	61414-41	NM-254E	Sanidine	Step B	1	47.8749	NA	91.925	±	0	75.86	±	0.036	2	76.323	±	0.155904
CM-SS4	OA	MDC	61414-52	NM-254E	Sanidine	Plateau	2	100	0.92	92.942	±	18.224	76.044	±	0.137992	2	76.1686	±	0.190262
CM-SS4	OA	MDC	61414-62	NM-254E	Sanidine	Step B	1	63.6882	NA	65.773			76.0862	±	0.0494411	2	76.6512	±	0.159008
CM-SS4	OA	MDC	61414-24	NM-254E	Sanidine	Plateau	2	100	1.09	66.765	±	14.688	76.1173	±	0.100704	2	76.207	±	0.131109
CM-SS4	OA	MDC	61414-61	NM-254E	Sanidine	Plateau	2	100	1.86	69.261	±	44.744	76.1327	±	0.10861	2	76.247	±	0.130293
CM-SS4	OA	MDC	61414-22	NM-254E	Sanidine	Plateau	2	100	0.66	87.977	±	0	76.2	±	0.0962971	2	76.2388	±	0.106981
CM-SS4	OA	MDC	61414-27	NM-254E	Sanidine	Plateau	2	100	8.04	98.243	±	31.874	76.2466	±	0.231103	2	76.4683	±	0.142354
CM-SS4	OA	MDC	61414-78	NM-254E	Sanidine	Step B	1	96.2505	NA	65.404			76.303	±	0.0989286	2	77.4682	±	0.282362
CM-SS4	OA	MDC	61414-36	NM-254E	Sanidine	Plateau	2	100	6.12	100.121	±	79.078	76.3124	±	0.0969351	2	76.3645	±	0.0961479
CM-SS4	OA	MDC	61414-56	NM-254E	Sanidine	Plateau	2	100	11.97	96.579	±	9.655	76.4046	±	0.266325	2	76.1017	±	0.14664
CM-SS4	OA	MDC	61414-35	NM-254E	Sanidine	Plateau	2	100	2.55	124.515	±	7.715	76.4094	±	0.141488	2	76.2601	±	0.148122
CM-SS4	OA	MDC	61414-43	NM-254E	Sanidine	Plateau	2	100	2.05	144.016	±	85.095	76.5905	±	0.362448	2	75.7326	±	0.676512
CM-SS4	OA	MDC	61414-46	NM-254E	Sanidine	Step B	1	94.3983	NA	160.537			81.852	±	0.0316544	2	84.6268	±	0.126865
CM-SS4	OA	MDC	61414-33	NM-254E	Sanidine	Step B	1	61.766	NA	104.5	±		82.717	±	0.022	2	82.9647	±	0.117527
CM-SS4	OA	MDC	61414-80	NM-254E	Sanidine	Step B	1	66.0419	NA	84.123			86.9	±	0.075	2	83.8162	±	0.234825
CM-SS4	OA	MDC	61414-26	NM-254E	Sanidine	Step B	1	97.2	NA	145.7			102.493	±	0.0490176	2	103.261	±	0.180668
CM-SS4	OA	MDC	61414-77	NM-254E	Sanidine	Plateau	2	100	1.52	23.178	±	1.778	153.245	±	0.354608	2	153.775	±	0.523819
CM-SS4	OA	MDC	61414-70	NM-254E	Sanidine	Plateau	2	100	0.2	190.013	±	121.882	161.933	±	0.201356	2	161.864	±	0.253307
CM-SS4	OA	MDC	61414-73	NM-254E	Sanidine	Step B	1	98.6455	NA	416.867			178.429	±	0.0640009	2	179.483	±	0.26612
CM-SS4	OA	MDC	61414-67	NM-254E	Sanidine	TGA	2	100	NA	156			189.963	±	0.508043	2	189.963	±	0.508043
CM-SS4	OA	MDC	61414-85	NM-254E	Sanidine	Plateau	2	100	17.21	212.72	±	183.579	193.397	±	0.494353	2	194.976	±	0.452712
CM-SS4	OA	MDC	61414-32	NM-254E	Sanidine	Plateau	2	100	13.32	197.018	±	77.92	193.972	±	0.315418	2	194.695	±	0.308179
CM-SS4	OA	MDC	61414-84	NM-254E	Sanidine	Plateau	2	100	0	375.948	±	0	194.624	±	0.289043	2	194.642	±	0.385814
CM-SS4	OA	MDC	61414-16	NM-254E	Sanidine	Plateau	2	13.0895	1.55	84.639	±	0	205.836	±	1.87833	5	215.966	±	0.931428
CM-SS4	OA	MDC	61414-53	NM-254E	Sanidine	TGA	2	100	NA	66.597			374.425	±	0.513207	2	374.425	±	0.513207
CM-SS4	OA	MDC	61414-86	NM-254E	Sanidine	TGA	2	100	NA	45.5599			387.357	±	1.83542	2	387.357	±	1.83542
CM-SS4	OA	MDC	61414-57	NM-254E	Sanidine	Plateau	2	100	287.35	492.427	±	0	639.238	±	4.63908	2	637.506	±	0.929161
CM-SS4	OA	MDC	61414-69	NM-254E	Sanidine	Plateau	2	100	NA	214			691.352	±	1.40382	2	691.352	±	1.40382
CM-SS4	OA	MDC	61414-87	NM-254E	Sanidine	TGA	2	100	NA	105.074			879.337	±	1.21366	2	879.337	±	1.21366
CM-SS4	OA	MDC	61414-71	NM-254E	Sanidine	TGA	2	100	NA				929.824	±	1.43018	2	929.824	±	1.43018
CM-SS4	OA	MDC	61414-20	NM-254E	Sanidine	TGA	2	100	NA	110	±	0	1299.44	±	1.46592	2	1299.44	±	1.46592
SJ-SS5	OA	DNZ	61405-39	NM-254D	Sanidine	Plateau	2	100	0.34	125.164	±	0	73.3923	±	0.107147	2	73.4541	±	0.146238
SJ-SS5	OA	DNZ	61405-32	NM-254D	Sanidine	Plateau	2	100	0.07	113.83	±	0	74.1533	±	0.115598	2	74.1784	±	0.149002
SJ-SS5	OA	DNZ	61405-05	NM-254D	Sanidine	Plateau	2	100	0.11	164.976	±	0	74.2601	±	0.111002	2	74.2253	±	0.153935
SJ-SS5	OA	DNZ	61405-18	NM-254D	Sanidine	Plateau	2	100	0.14	28.7	±	0	74.3155	±	0.149155	2	74.3269	±	0.151412
SJ-SS5	OA	DNZ	61405-27	NM-254D	Sanidine	Plateau	2	100	9.98	117.23	±	38.426	74.3412	±	0.443555	2	74.3658	±	0.147691
SJ-SS5	OA	DNZ	61405-21	NM-254D	Sanidine	Plateau	2	100	0.13	114.18	±	39.808	74.3516	±	0.0849773	2	74.3281	±	0.108058
SJ-SS5	OA	DNZ	61405-14	NM-254D	Sanidine	Plateau	2	100	2.38	152.091	±	0	74.7596	±	0.254667	2	74.9382	±	0.204678
SJ-SS5	OA	DNZ	61405-06	NM-254D	Sanidine	Plateau	2	100	0.42	347.521	±	297.029	74.78	±	0.16309	2	74.7564	±	0.167012
SJ-SS5	OA	DNZ	61405-25	NM-254D	Sanidine	Plateau	2	100	0.71	194.975	±	5.407	75.0498	±	0.151937	2	75.0004	±	0.16295
SJ-SS5	OA	DNZ	61405-10	NM-254D	Sanidine	Plateau	2	100	0.68	0	±	0	75.529	±	0.411481	2	75.6547	±	0.432549
SJ-SS5	OA	DNZ	61405-17	NM-254D	Sanidine	Plateau	2	100	1.1	355.325	±	322.339	75.5979	±	0.0857833	2	75.6282	±	0.0876456
SJ-SS5	OA	DNZ	61405-08	NM-254D	Sanidine	Plateau	2	100	0.09	68.68	±	44.782	76.0012	±	0.109499	2	76.0365	±	0.159319
SJ-SS5	OA	DNZ	61405-23	NM-254D	Sanidine	Plateau	2	100	1.87	371.105	±	303.526	76.0223	±	0.122242	2	75.9621	±	0.105287
SJ-SS5	OA	DNZ	61405-04	NM-254D	Sanidine	Plateau	2	100	0.87	72.172	±	27.031	78.301	±	0.15921	2	78.3489	±	0.166898
SJ-SS5	OA	DNZ	61405-11	NM-254D	Sanidine	Plateau	2	100	0.53	65.488	±	17.679	78.4634	±	0.144659	2	78.4906	±	0.149191
SJ-SS5	OA	DNZ	61405-12	NM-254D	Sanidine	Plateau	2	100	0.01	80.474	±	4.211	78.4907	±	0.125636	2	78.489	±	0.126912
SJ-SS5	OA	DNZ	61405-24	NM-254D	Sanidine	Step B	1	40.9935	NA	64.752	±	0	81.08	±	0.23	2	78.4748	±	0.161548
SJ-SS5	OA	DNZ	61405-13	NM-254D	Sanidine	Plateau	2	100	2.62	226.032	±	32.714	98.9283	±	0.142884	2	98.9924	±	0.108587
SJ-SS5	OA	DNZ	61405-38	NM-254D	Sanidine	Plateau	2	100	2.14	57.8	±	0	162.596	±	0.452012	2	163.047	±	0.43986
SJ-SS5	OA	DNZ	61405-26	NM-254D	Sanidine	Plateau	2	100	0.43	59.488	±	40.74	164.858	±	0.28684	2	164.795	±	0.302745
SJ-SS5	OA	DNZ	61405-47	NM-254D	Sanidine	TGA	2	100	NA	122.758			170.3	±	0.169556	2	170.3	±	0.169556
SJ-SS5	OA	DNZ	61405-31	NM-254D	Sanidine	Plateau	2	100	10.14	1315.64	±	0	194.042	±	0.527899	2	194.487	±	0.245597
SJ-SS5	OA	DNZ	61405-40	NM-254D	Sanidine	Plateau	2	100	0.97	0	±	0	194.702	±	0.202021	2	194.881	±	0.268842
SJ-SS5	OA	DNZ	61405-16	NM-254D	Sanidine	TGA	2	100	NA	1036.79			235.355	±	0.211734	2	235.355	±	0.211734
SJ-SS5	OA	DNZ	61405-49	NM-254D	Sanidine	TGA	2	100	NA	695.579			357.636	±	0.417368	2	357.636	±	0.417368
SJ-SS5	OA	DNZ	61405-07	NM-254D	Sanidine	TGA	2	100	NA	197.83			567.151	±	0.444791	2	567.151	±	0.444791
SJ-SS5	OA	DNZ	61405-34	NM-254D	Sanidine	TGA	2	100	NA	163.893			593.422	±	0.914343	2	593.422	±	0.914343
SJ-SS5	OA	DNZ	61405-45	NM-254D	Sanidine	TGA	2	100	NA	548.074			747.676	±	0.596958	2	747.676	±	0.596958
SJ-SS5	OA	DNZ	61405-46	NM-254D	Sanidine	TGA	2	100	NA	69.6391			751.835	±	1.43618	2	751.835	±	1.43618
SJ-SS5	OA	DNZ	61405-33	NM-254D	Sanidine	TGA	2	100	NA	163.893			752.761	±	0.506305	2	752.761	±	0.506305
SJ-SS5	OA	DNZ	61405-51	NM-254D	Sanidine	TGA	2	100	NA	821.551			807.563	±	0.95865	2	807.563	±	0.95865
SJ-SS5	OA	DNZ	61405-44	NM-254D	Sanidine	TGA	2	100	NA	46.3553			861.118	±	1.56759	2	861.118	±	1.56759
SJ-SS5	OA	DNZ	61405-43	NM-254D	Sanidine	TGA	2	100	NA	324.013			867.358	±	0.883034	2	867.358	±	0.883034
SJ-SS5	OA	DNZ	61405-30	NM-254D	Sanidine	TGA	2	100	NA	163.893			883.71	±	0.711821	2	883.71	±	0.711821
SJ-SS5	OA	DNZ	61405-28	NM-254D	Sanidine	TGA	2	100	NA				1039.12	±	1.08341	2	1039.12	±	1.08341
SJ-SS5	OA	DNZ	61405-19	NM-254D	Sanidine	TGA	2	100	NA	154.1			1043.91	±	0.966032	2	1043.91	±	0.966032
SJ-SS5	OA	DNZ	61405-29	NM-254D	Sanidine	TGA	2	100	NA	411.114			1141.14	±	0.68808	2	1141.14	±	0.68808
SJ-SS5	OA	DNZ	61405-50	NM-254D	Sanidine	TGA	2	100	NA	225.47			1322.08	±	1.2313	2	1322.08	±	1.2313
SJ-SS6	NAC	DNZ	61406-41	NM-254D	Sanidine	Plateau	4	100	7.04	150.9	±	77.9	65.3688	±	0.0888149	4	65.367	±	0.0667331
SJ-SS6	NAC	DNZ	61406-28	NM-254D	Sanidine	Plateau	4	100	9.48	133.6	±	89.5	65.5058	±	0.117805	4	65.4958	±	0.0633858
SJ-SS6	NAC	DNZ	61406-06	NM-254D	Sanidine	Plateau	4	100	0.45	115.9	±	55.3	67.9039	±	0.0974401	4	67.8864	±	0.272243
SJ-SS6	NAC	DNZ	61406-12	NM-254D	Sanidine	Plateau	3	100	0.97	135.2	±	76.2	67.9082	±	0.0663704	3	67.9386	±	0.0761192
SJ-SS6	NAC	DNZ	61406-24	NM-254D	Sanidine	Step B	1	88.5	NA	183.731			67.9212	±	0.0174193	2	68.003	±	0.0624136
SJ-SS6	NAC	DNZ	61406-25	NM-254D	Sanidine	Plateau	2	100	0	107.446	±	68.792	67.9293	±	0.0670799	2	67.9258	±	0.163942
SJ-SS6	NAC	DNZ	61406-26	NM-254D	Sanidine	Plateau	2	100	7.87	173.475	±	121.102	67.9558	±	0.257636	2	68.4649	±	0.203798
SJ-SS6	NAC	DNZ	61406-04	NM-254D	Sanidine	Plateau	2	100	1.99	141.003	±	0	67.9711	±	0.0672597	2	68.1076	±	0.11273
SJ-SS6	NAC	DNZ	61406-27	NM-254D	Sanidine	Plateau	2	100	0.17	124.257	±	4.814	68.045	±	0.0829028	2	68.055	±	0.0855014
SJ-SS6	NAC	DNZ	61406-03	NM-254D	Sanidine	Plateau	4	100	5.09	164.4	±	92	68.0836	±	0.152476	4	68.2615	±	0.109366
SJ-SS6	NAC	DNZ	61406-38	NM-254D	Sanidine	Plateau	2	100	0.22	65.38	±	4.101	68.1388	±	0.108357	2	68.0532	±	0.212985
SJ-SS6	NAC	DNZ	61406-23	NM-254D	Sanidine	Step B	1	84.5	NA	127.679			68.1716	±	0.0338569	2	68.4725	±	0.123702
SJ-SS6	NAC	DNZ	61406-36	NM-254D	Sanidine	Plateau	2	100	3.7	150.602	±	106.564	68.2158	±	0.103806	2	68.6176	±	0.200147
SJ-SS6	NAC	DNZ	61406-34	NM-254D	Sanidine	Plateau	2	100	0.05	76.422	±	51.707	68.3219	±	0.0831523	2	68.2709	±	0.252994
SJ-SS6	NAC	DNZ	61406-30	NM-254D	Sanidine	Plateau	2	100	11.93	140.698	±	78.803	68.3234	±	0.138311	2	68.2284	±	0.071831
SJ-SS6	NAC	DNZ	61406-07	NM-254D	Sanidine	Plateau	2	100	0	231.087	±	164.562	73.8263	±	0.24447	2	73.8368	±	0.323953
SJ-SS6	NAC	DNZ	61406-15	NM-254D	Sanidine	Plateau	2	100	0.81	112.783	±	36.238	73.8594	±	0.106282	2	73.8572	±	0.106127
SJ-SS6	NAC	DNZ	61406-33	NM-254D	Sanidine	Plateau	2	100	0.36	59.203	±	0	74.083	±	0.245296	2	73.9934	±	0.285642
SJ-SS6	NAC	DNZ	61406-29	NM-254D	Sanidine	Plateau	2	100	1.36	81.015	±	0	74.1634	±	0.239881	2	74.1683	±	0.207386
SJ-SS6	NAC	DNZ	61406-21	NM-254D	Sanidine	Plateau	2	100	0.05	53.907	±	25.226	74.3649	±	0.269961	2	74.3133	±	0.353097
SJ-SS6	NAC	DNZ	61406-09	NM-254D	Sanidine	Plateau	2	100	0.01	43.72	±	24.189	74.4543	±	0.122599	2	74.4436	±	0.155947
SJ-SS6	NAC	DNZ	61406-08	NM-254D	Sanidine	Plateau	2	100	2.84	160.769	±	114.449	74.4907	±	0.245818	2	74.6614	±	0.183454
SJ-SS6	NAC	DNZ	61406-10	NM-254D	Sanidine	Plateau	3	100	0.48	72.1	±	42.7	74.6638	±	0.205224	3	74.6101	±	0.29976
SJ-SS6	NAC	DNZ	61406-42	NM-254D	Sanidine	Plateau	2	100	2.26	20.673	±	0	74.9558	±	0.600057	2	75.2626	±	0.447576
SJ-SS6	NAC	DNZ	61406-43	NM-254D	Sanidine	Plateau	2	100	0.63	27.337	±	17.157	75.2529	±	0.374412	2	75.4947	±	0.471513
SJ-SS6	NAC	DNZ	61406-37	NM-254D	Sanidine	Plateau	2	100	1.96	91.82	±	45.714	75.3304	±	0.319578	2	75.5913	±	0.297047
SJ-SS6	NAC	DNZ	61406-40	NM-254D	Sanidine	Plateau	2	100	4.54	62.854	±	43.769	75.3522	±	0.531051	2	75.4035	±	0.254984
SJ-SS6	NAC	DNZ	61406-16	NM-254D	Sanidine	Plateau	2	100	0.16	66.213	±	46.833	75.6389	±	0.174742	2	75.6974	±	0.224374
SJ-SS6	NAC	DNZ	61406-22	NM-254D	Sanidine	Plateau	2	100	0.03	0.196	±	0	78.275	±	0.27462	2	78.2208	±	0.403986
SJ-SS6	NAC	DNZ	61406-13	NM-254D	Sanidine	Plateau	2	100	3.58	46.217	±	24.504	95.7004	±	1.60241	2	96.0382	±	0.861568
SJ-SS6	NAC	DNZ	61406-14	NM-254D	Sanidine	Plateau	2	100	1.74	84.161	±	56.408	1371.93	±	2.40888	2	1373.32	±	2.15247
Notes:
FM - formation (OA: Ojo Alamo Sandstone, NAC: Nacimiento Formation)
Section - sample location (DNZ: De-Na-Zin, MDC: Mesa de Cuba)
L# - sample number | Irrad - irradation run | min - mineralogy of sample
n - number of measurements used | analysis - type of analysis used for preferred age
Preferred Age - age estimate using only samples included in plateau calculations
Isotopic ratios corrected for blank, radioactive decay, and mass discrimination, not corrected for interfering reactions.
Errors quoted for individual analyses include analytical error only, without interfering reaction or J uncertainties.
Integrated age calculated by summing isotopic measurements of all steps.
Integrated age error calculated by quadratically combining errors of isotopic measurements of all steps.
Plateau age is inverse-variance-weighted mean of selected steps.
Plateau age error is inverse-variance-weighted mean error (Taylor, 1982) times root MSWD where MSWD>1.
Isotopic abundances after Steiger and Jäger (1977).
Italicized sample ID denotes analyses excluded from plateau age calculations.
Ages calculated relative to FC-2 Fish Canyon Tuff sanidine interlaboratory standard at 28.201 Ma (Kuiper et al., 2008)
Decay Constant (LambdaK (total)) = 5.463e-10/a (Min et al., 2000)
